# Supplementary material for: A randomized, double-blind, placebo-controlled, cross-over trial to evaluate the effect of EstroSense ® on 2-hydroxyestrone:16α-hydroxyestrone ratio in premenopausal women
Source: publisher site journal article supplement (doi:10.1515/jcim-2022-0301), 2022-10-06
Supplement: Supplementary file 1 [file j_jcim-2022-0301_suppl.docx]

| Metabolite | CV (%) |
| --- | --- |
| Estrone | 6 |
| Estradiol | 7 |
| Estriol | 11 |
| 2-Hydroxyestrone | 11 |
| 2-Hydroxyestradiol | 11 |
| 4-Hydroxyestrone | 17 |
| 16α-Hydroxyestrone | 13 |
| 2-Methoxyestrone | 10 |

**Supplemental Material**

Average inter-assay coefficient of variation

(CV) of estrogen metabolites.
